# Supplementary material for: A colorimetric sensor array of porous pigments
Source: Royal Society of Chemistry journal article supplement (doi:10.1039/b916571a), 2009-01-01
Supplement: b916571a.pdf [file b916571a.pdf]

# Supporting Information:

## A colorimetric sensor array of porous pigments

*Sung H. Lim,<sup>a</sup> Jonathan W. Kemling,<sup>b</sup> Liang Feng,<sup>b</sup> and Kenneth S. Suslick<sup>\*b</sup>*

<sup>a</sup> *iSense, LLC, 470 Ramona St., Palo Alto, CA 94301 USA.*

<sup>b</sup> *University of Illinois at Urbana-Champaign, Department of Chemistry,*

*600 S. Mathews Av., Urbana, IL 61801, USA.*

\* Corresponding author. E-mail: ksuslick@illinois.edu

Porphyrins (spots #1-10 in Table S1, below): Phenethyltrimethoxysilane, diethylene glycol dimethyl ether, 1,2-dichlorobenzene and nano-pure water were combined in a molar ratio ~1:8:6:3. pH and Solvatochromic Indicators (spots #11-36): Methyltriethoxysilane, triethoxy(octyl)silane, HCl (0.1M aqueous), 2-methoxyethanol, propylene glycol monomethyl ether acetate, and nano-pure water were combined in a molar ratio ~1:1:0.05:25:10:70. For spots #11-20, ~20  $\mu$ L of 0.5 M NaOH in a 1:1 H<sub>2</sub>O/2-methoxyethanol solution were added. The formulation A and B were stirred overnight at room temperature separately, and then added to the selected indicators (listed below in Table S1) and the solutions loaded into a 1" x 1" x 1/2" Teflon block containing 36 individual cylindrical wells. A floating slotted pin array printer delivered ~100 nL of the dye-containing formulations from the Teflon ink wells onto the surface of the PVDF membrane. Once printed, the arrays were placed in a nitrogen-flushed desiccator for 3 days.

**Table S1.** List of the colorants in the sol-gel pigments of the colorimetric sensor array.

| Spot #<br>(left to right,<br>top to bottom) | Name                                                                        | mg/mL |
|---------------------------------------------|-----------------------------------------------------------------------------|-------|
| 1                                           | 2,3,7,8,12,13,17,18-Octaethyl-21H,23H-porphine zinc(II)                     | 3.0   |
| 2                                           | 5,10,15,20-Tetraphenyl-21H,23H-porphine zinc                                | 5.0   |
| 3                                           | 5,10,15,20-Tetrakis(2,4,6-trimethylphenyl)porphine zinc                     | 4.0   |
| 4                                           | 5,10,15,20-Tetrakis(pentafluorophenyl)-21H,23H-porphine zinc                | 4.0   |
| 5                                           | 5,10,15,20-Tetraphenyl-21H,23H-porphine manganese(III) chloride             | 5.0   |
| 6                                           | 5,10,15,20-Tetrakis(pentafluorophenyl)-21H,23H-porphyrin iron(III) chloride | 5.0   |
| 7                                           | 5,10,15,20-Tetraphenyl-21H,23H-porphine cobalt(II)                          | 3.0   |
| 8                                           | 5,10,15,20-Tetraphenyl-21H,23H-porphine indium chloride                     | 3.0   |
| 9                                           | 5,10,15,20-Tetrakis(2,4,6-trimethylphenyl)-21H,23H-porphine                 | 4.0   |
| 10                                          | 5,10,15,20-Tetrakis(4-hydroxyphenyl)-21H,23H-porphyrin                      | 4.0   |
| 11                                          | Fluorescein + NaOH                                                          | 2.0   |
| 12                                          | Methyl Red + NaOH                                                           | 4.0   |
| 13                                          | Chlorophenol Red + NaOH                                                     | 4.0   |
| 14                                          | Phenol Red + NaOH                                                           | 4.0   |
| 15                                          | Brilliant Yellow + NaOH                                                     | 4.0   |
| 16                                          | Cresol Red + NaOH                                                           | 4.0   |
| 17                                          | <i>m</i> -Cresol Purple + NaOH                                              | 4.0   |
| 18                                          | Thymol Blue + NaOH                                                          | 4.0   |
| 19                                          | Alizarin + NaOH                                                             | 2.0   |
| 20                                          | Basic Fuchsin + NaOH                                                        | 2.0   |
| 21                                          | Crystal Violet                                                              | 1.0   |

|    |                      |     |
|----|----------------------|-----|
| 22 | Metanil Yellow       | 4.0 |
| 23 | Methyl Orange        | 2.0 |
| 24 | Bromocresol Green    | 4.0 |
| 25 | Methyl Red           | 4.0 |
| 26 | Bromophenol Red      | 4.0 |
| 27 | Bromothymol Blue     | 4.0 |
| 28 | Nitrazine Yellow     | 4.0 |
| 29 | Acridine Orange Base | 4.0 |
| 30 | Naphthol Blue Black  | 1.0 |
| 31 | Bromopyrogallol Red  | 2.0 |
| 32 | Pyrocatechol Violet  | 2.0 |
| 33 | Nile Red             | 0.5 |
| 34 | Nile Blue            | 4.0 |
| 35 | Disperse Orange #25  | 1.0 |
| 36 | Reichardt's Dye #3   | 1.0 |

---
